# Supplementary material
Source: publisher figshare collection journal article supplement (https://acs.figshare.com/ndownloader/files/18022337)
Supplement: Supplementary file 1 [file 18022337]

## Supplementary Information

### Double-hydrophilic block copolymers based on functional poly( $\epsilon$ -caprolactone)s for pH-dependent controlled drug delivery

Ayman El Jundi,<sup>a,b</sup> Sytze Buwalda,<sup>a</sup> Audrey Bethry,<sup>a</sup> Sylvie Hunger,<sup>a</sup> Jean Coudane,<sup>a</sup> Youssef Bakkour,<sup>b</sup> Benjamin Nottelet<sup>a\*</sup>

<sup>a</sup> IBMM, Univ Montpellier, CNRS, ENSCM, Montpellier, France

<sup>b</sup> Laboratory of Applied Chemistry (LAC), Faculty of Science III, Lebanese University, P.O. Box 826, Tripoli, Lebanon

#### List of supplementary material

**Table S1.** Characterization of PEG-*b*-PCL diblock copolymers.

**Table S2.** Parameters study for the propargylation of PEG-*b*-PCL diblock copolymers

**Figure S1.** <sup>1</sup>H NMR (CDCl<sub>3</sub>) of PEG<sub>1.9k</sub>-*b*-PCL<sub>1.9k</sub>

**FigureS2.** <sup>1</sup>H NMR (CDCl<sub>3</sub>) of PEG<sub>1.9k</sub>-*b*-PCL<sub>1.3k</sub>(YNE)<sub>15</sub>

**Figure S3.** <sup>1</sup>H NMR (CDCl<sub>3</sub>) of PEG<sub>1.9k</sub>-*b*-PCL<sub>1.1k</sub>(OH)<sub>52</sub>

**Figure S4.** <sup>1</sup>H NMR (DMSO-d<sub>6</sub>) of PEG<sub>1.8k</sub>-*b*-PCL<sub>1.4k</sub>(NH<sub>2</sub>)<sub>58</sub>

**Figure S5.** Dose dependent viability of MCF-7 cells in culture medium containing various PBS concentrations.

**Table S1:** Characterization of PEG-*b*-PCL diblock copolymers.

| Copolymer                                           | Targeted Mn for PCL block (g/mol) | Mn <sub>NMR</sub> PEG <sup>a</sup> (g/mol) | Mn <sub>NMR</sub> PCL <sup>b</sup> (g/mol) | Mn <sub>NMR</sub> PEG- <i>b</i> -PCL (g/mol) | Mn <sub>SEC</sub> (g/mol) | Đ   | EG/CL <sup>c</sup> |
|-----------------------------------------------------|-----------------------------------|--------------------------------------------|--------------------------------------------|----------------------------------------------|---------------------------|-----|--------------------|
| PEG <sub>4.9K</sub> - <i>b</i> -PCL <sub>4.7K</sub> | 5000                              | 4900                                       | 4700                                       | 9600                                         | 9000                      | 1.4 | 2.8                |
| PEG <sub>1.9K</sub> - <i>b</i> -PCL <sub>1.9K</sub> | 2000                              | 1900                                       | 1900                                       | 3800                                         | 4500                      | 1.4 | 2.5                |

<sup>a</sup> Calculated from the <sup>1</sup>H NMR spectra by comparison of the peak at 3.6 ppm of the methylene groups with the peak at 3.3 ppm of the terminal methyl group of PEG.

<sup>b</sup> Calculated from the <sup>1</sup>H NMR spectra by comparison of the peak at 3.6 ppm of the methylene groups of PEG with the peak at 4.0 ppm of the methylene group of PCL.

<sup>c</sup> Ratio of ethylene glycol / ε-caprolactone units as determined by <sup>1</sup>H NMR spectroscopy.

**Table S2:** Parameters study for the propargylation of PEG-*b*-PCL diblock copolymers

| Entry | Starting copolymer                                  | LDA<br>(eq. / CL units) | PgBr<br>(eq. / CL units) | SD <sup>a</sup> (%) | Mn <sub>NMR</sub> <sup>b</sup><br>PCL (g/mol) | Đ   | Yield<br>(wt%) |
|-------|-----------------------------------------------------|-------------------------|--------------------------|---------------------|-----------------------------------------------|-----|----------------|
| 1     | PEG <sub>1.9K</sub> - <i>b</i> -PCL <sub>1.7K</sub> | 1                       | 2                        | 26                  | 1200                                          | 1.6 | 50%            |
| 2     | PEG <sub>1.9K</sub> - <i>b</i> -PCL <sub>1.7K</sub> | 1                       | 2                        | 28                  | 1100                                          | 1.9 | 45%            |
| 3     | PEG <sub>1.9K</sub> - <i>b</i> -PCL <sub>1.7K</sub> | 0.5                     | 2                        | 15                  | 1300                                          | 1.7 | 80%            |
| 4     | PEG <sub>1.9K</sub> - <i>b</i> -PCL <sub>1.7K</sub> | 0.5                     | 2                        | 16                  | 1400                                          | 1.7 | 80%            |
| 5     | PEG <sub>1.9K</sub> - <i>b</i> -PCL <sub>1.7K</sub> | 1                       | 2                        | 25                  | 1100                                          | 1.7 | 55%            |
| 6     | PEG <sub>1.9K</sub> - <i>b</i> -PCL <sub>1.7K</sub> | 0.5                     | 2                        | 17                  | 1400                                          | 1.7 | 70%            |
| 7     | PEG <sub>1.9K</sub> - <i>b</i> -PCL <sub>1.9K</sub> | 0.5                     | 2                        | 18                  | 1300                                          | 1.7 | 70%            |
| 8     | PEG <sub>1.9K</sub> - <i>b</i> -PCL <sub>1.9K</sub> | 0.5                     | 2                        | 15                  | 1300                                          | 1.8 | 75%            |
| 9     | PEG <sub>4.9K</sub> - <i>b</i> -PCL <sub>4.7K</sub> | 1                       | 2                        | 17                  | 2900                                          | 1.6 | 50%            |
| 10    | PEG <sub>4.9K</sub> - <i>b</i> -PCL <sub>4.7K</sub> | 0.5                     | 2                        | 8                   | 3700                                          | 1.7 | 70%            |

<sup>a</sup> Substitution degree defined as the percentage of CL units substituted by alkyne groups, calculated from the <sup>1</sup>H NMR spectra by comparison of the peaks at 2.0 ppm and 2.4-2.6 ppm of the propargyl group with the peak at 4.1 ppm of the methylene group of PCL.

<sup>b</sup> Calculated from the <sup>1</sup>H NMR spectra by comparison of the peak at 3.6 ppm of the methylene groups of PEG with the peak at 4.1 ppm of the methylene group of PCL.

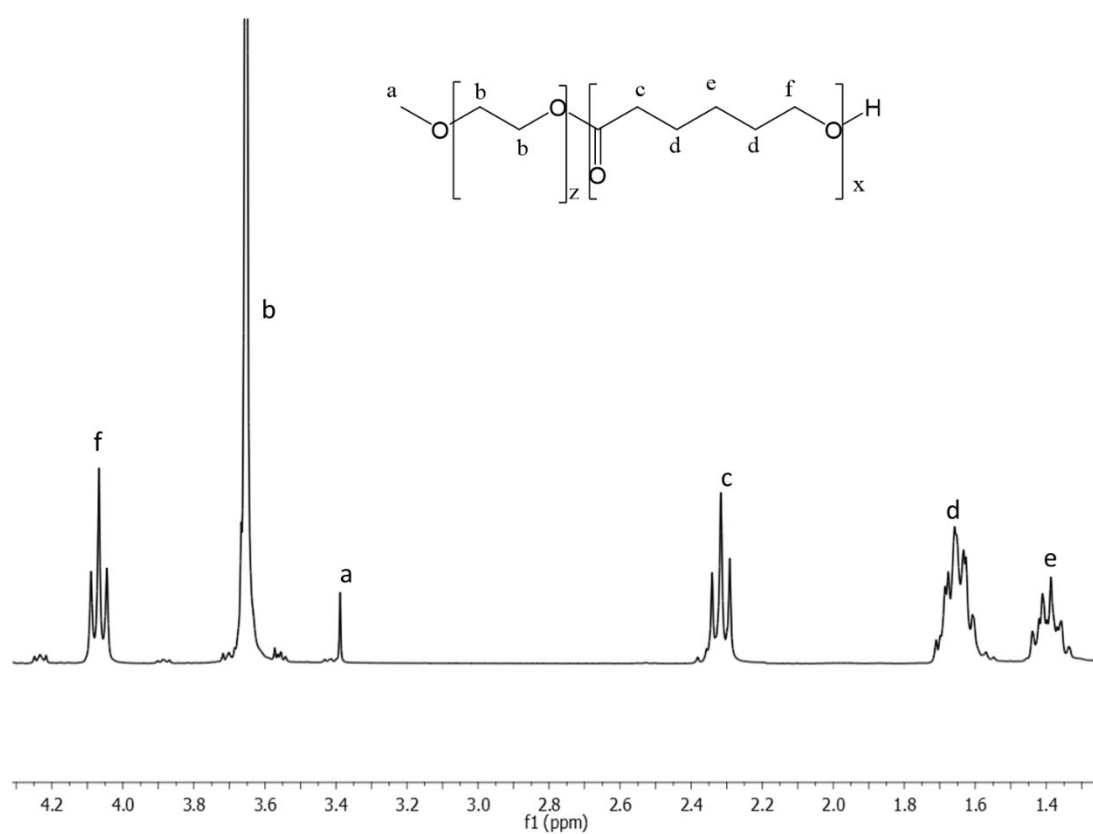

**Figure S1:**  $^1\text{H}$  NMR (CDCl<sub>3</sub>) of PEG<sub>1.9k</sub>-b-PCL<sub>1.9k</sub>

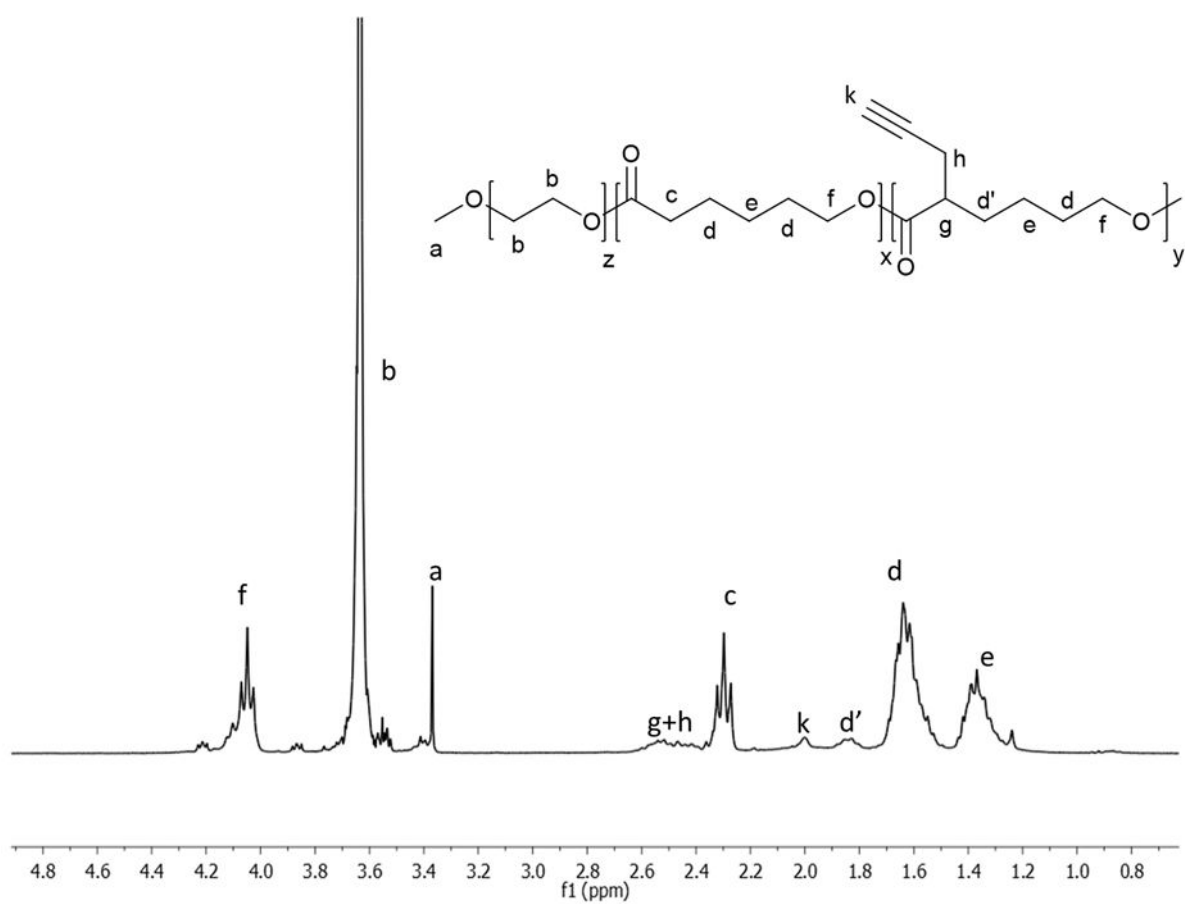

**Figure S2:**  $^1\text{H}$  NMR ( $\text{CDCl}_3$ ) of  $\text{PEG}_{1.9\text{k}}\text{-}b\text{-PCL}_{1.3\text{k}}(\text{YNE})_{15}$

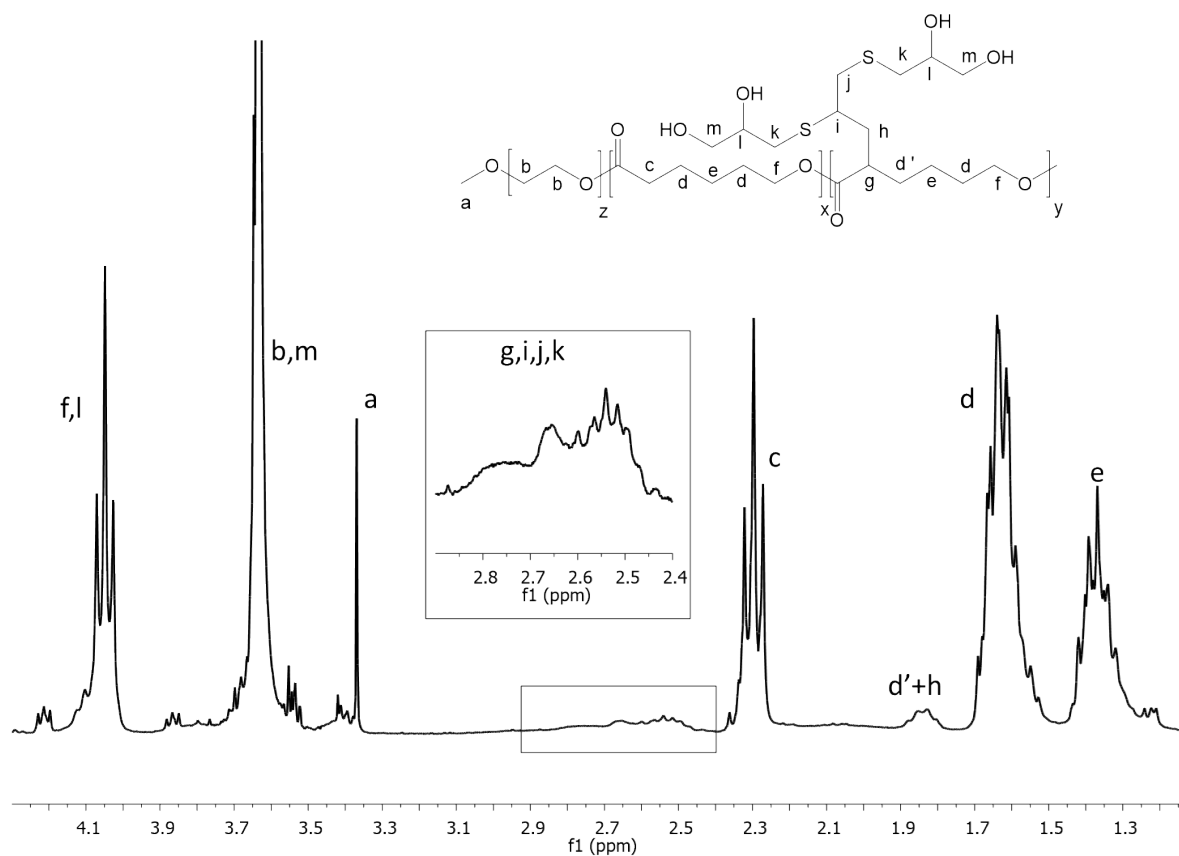

**Figure S3:**  $^1\text{H}$  NMR ( $\text{CDCl}_3$ ) of  $\text{PEG}_{1.9\text{k}}\text{-}b\text{-PCL}_{1.1\text{k}}(\text{OH})_{52}$

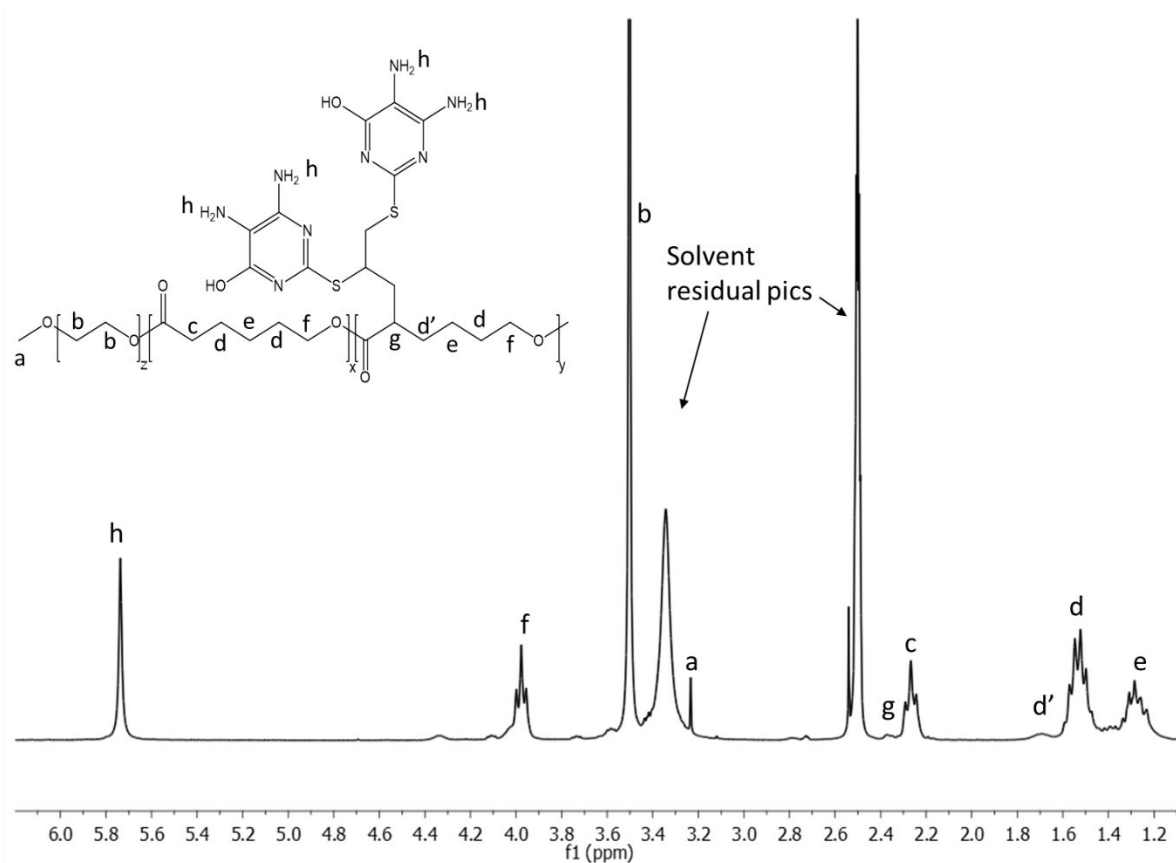

**Figure S4:**  $^1\text{H}$  NMR ( $\text{DMSO-d}_6$ ) of  $\text{PEG}_{1.8\text{k}}\text{-}b\text{-PCL}_{1.4\text{k}}(\text{NH}_2)_{58}$

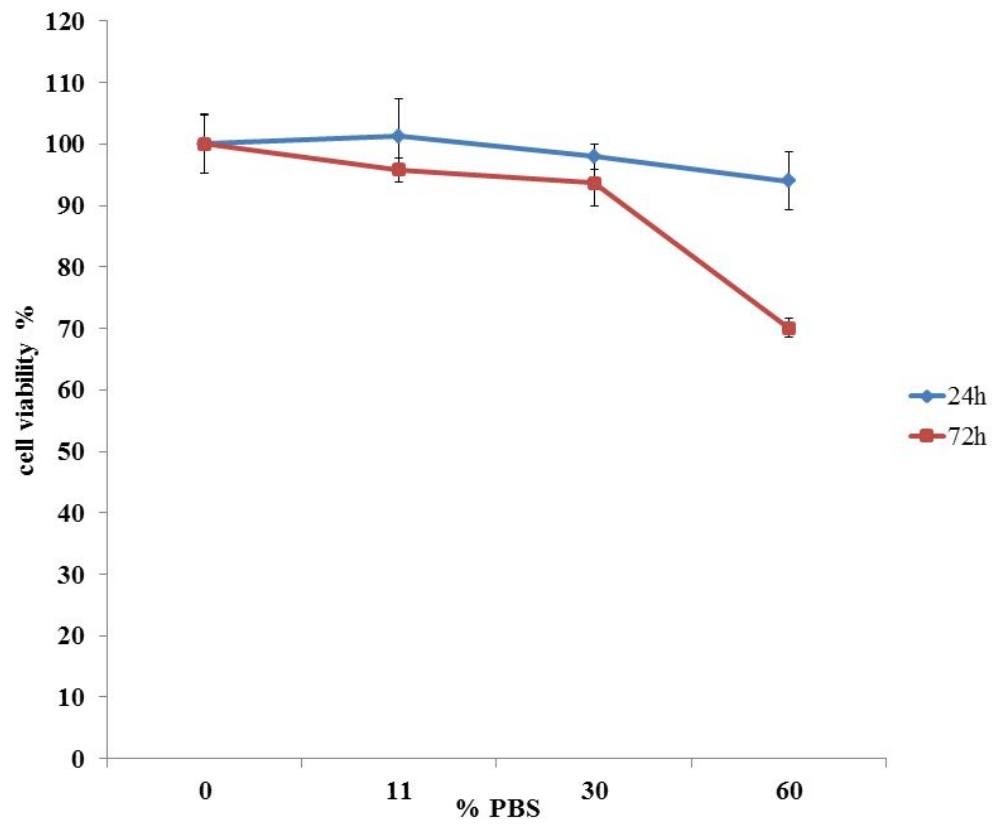

**Figure S5:** Dose dependent viability of MCF-7 cells in culture medium containing various PBS concentrations.
